# Supplementary material for: Functions of hydroxyapatite in fabricating N-doped carbon for excellent catalysts and supercapacitors
Source: Royal Society of Chemistry journal article supplement (doi:10.1039/c9cy00804g), 2019-01-01
Supplement: c9cy00804g1.pdf [file c9cy00804g1.pdf]

## **Functions of Hydroxyapatite in Fabricating N-doped Carbon for Excellent Catalyst and Supercapacitor**

Minzhe Chu,<sup>a</sup> Yingying Zhai,<sup>a</sup> Ningzhao Shang,<sup>b</sup> Xiaoyu Zhang,<sup>b</sup> Chun Wang,<sup>\*b</sup> Yunrui Zhang,<sup>a</sup>  
Haijun Wang<sup>a</sup> and Yongjun Gao<sup>\*a</sup>

*a* Key Laboratory of Analytical Science and Technology of Hebei Province, College of Chemistry  
and Environmental Science, Hebei University, 071002, Baoding, PR China.

*b* College of Science, Hebei Agricultural University, 071001, Baoding PR China.

E-mail: [yjgao@hbu.edu.cn](mailto:yjgao@hbu.edu.cn) ( Yongjun Gao )    [chunwang69@126.com](mailto:chunwang69@126.com) ( Chun Wang )

## Contents

|                                                                                                                                                                                                                                                                                                                                                                 |    |
|-----------------------------------------------------------------------------------------------------------------------------------------------------------------------------------------------------------------------------------------------------------------------------------------------------------------------------------------------------------------|----|
| Experimental .....                                                                                                                                                                                                                                                                                                                                              | 3  |
| <b>Chemicals</b> .....                                                                                                                                                                                                                                                                                                                                          | 3  |
| <b>Characterizations</b> .....                                                                                                                                                                                                                                                                                                                                  | 4  |
| Characterizations and Results.....                                                                                                                                                                                                                                                                                                                              | 5  |
| Fig. S1 The XRD of different carbon materials.....                                                                                                                                                                                                                                                                                                              | 5  |
| Fig. S2 Raman spectra of g-C(HAP), g-C(SiO <sub>2</sub> ), g-C(SiO <sub>2</sub> )-Ca and g-C(SiO <sub>2</sub> )-P. ....                                                                                                                                                                                                                                         | 6  |
| Fig. S3 a), c), e) and g) N <sub>2</sub> absorption-desorption isotherms of g-C(HAP), g-C(SiO <sub>2</sub> ), g-C(SiO <sub>2</sub> )-P and g-C(SiO <sub>2</sub> )-Ca; b), d), f) and h) pore size distributions of g-C(HAP), g-C(SiO <sub>2</sub> ), g-C(SiO <sub>2</sub> )-P and g-C(SiO <sub>2</sub> )-Ca based on NLDFIT model of adsorption isotherms. .... | 7  |
| Table S1. The textural properties of all samples.....                                                                                                                                                                                                                                                                                                           | 8  |
| Fig. S4 a) Full XPS spectrum of g-C(HAP), g-C(SiO <sub>2</sub> ), g-C(SiO <sub>2</sub> )-P and g-C(SiO <sub>2</sub> )-Ca, b) XPS C1s spectrum of g-C(HAP), g-C(SiO <sub>2</sub> ), g-C(SiO <sub>2</sub> )-P and g-C(SiO <sub>2</sub> )-Ca.....                                                                                                                  | 9  |
| Fig. S5 The structures of imines were all confirmed by GC-MS.....                                                                                                                                                                                                                                                                                               | 10 |
| Fig. S6 The conversion of benzylamine and the yield profile of the product imine at different reaction times. Reaction conditions: benzylamine ( 1 mmol ), solvent ( 3 mL ), NC(HAP) ( 0.01 g ), O <sub>2</sub> balloon, 50 °C. ....                                                                                                                            | 11 |
| Fig. S7 The experiment of silanization to capture intermediate which confirmed by GC-MS. a) phenylmethanimine, b) N-benzyl-1-phenylmethanediamine, c) hydroperoxide, d) ammonia.....                                                                                                                                                                            | 12 |
| Fig. S8 The configurations and energy of the oxygen adsorbed on model catalyst.....                                                                                                                                                                                                                                                                             | 13 |
| Fig. S9 The configurations and energy of benzylamine adsorbed on model catalyst anchoring oxygen molecule. ....                                                                                                                                                                                                                                                 | 14 |
| Fig. S10 a) The filtrate was obtained without NC(HAP) catalyst; b) The filtrate was obtained by hydroperoxide oxidized TMB.....                                                                                                                                                                                                                                 | 15 |

## Experimental

### Chemicals

Hydroxylapatite ( $\geq 97\%$ ), ammonium phosphate dibasic (AR, 99%) and benzylamine (AR, 99%) were purchased from Shanghai Macklin Biochemical Corporation. 4-(Trifluoromethyl) benzylamine (98%) and M-tolylmethanamine (98%) were purchased from LeYan factory. 1, 10-Phenanthroline (AR, 99%) was purchased from Shanghai Macklin Chemical Technology Factory. Phenyl hydrazine (AR), 4-Bromobenzylamine (97%) and 2-Thiophenylmethylamine (97%) were purchased from Shanghai Energy Chemical Technology Factory. 4-Methoxybenzylamine (95%) was purchased from Shanghai Shuya factory. Glucose (AR) was purchased from Tianjin Kermol Corporation. 4-Chlorobenzylamine (98%) and 4-Fluorobenzylamine (99%) were purchased from Aladdin Industrial Corporation. 3, 3', 5, 5'-Tetramethylbenzidine (AR,  $\geq 99\%$ ) was purchased from Sigma-Aldrich (Shanghai) Trading Corporation. Benzoic Acid (AR,  $\geq 99\%$ ) and dichloromethane (AR,  $\geq 99\%$ ) were purchased from Tianjin chemical reagent factory. Sodium hydroxide was from Tianjin Beichen reagent factory. Benzoquinone (AR,  $\geq 99\%$ ) was purchased from J&K Scientific LTD. Phenol was purchased from Tianjin Fuchen chemical reagents factory. Tertiary butanol (GR, 98%) was purchased from Tianjin Guangfu fine chemical research institute. All chemicals were used without further purification.

## Characterizations

Transmission electronic microscopy ( TEM, Tecnai G2 F20 ) was used to research the morphology of NC(HAP). X-ray diffractometer ( XRD, Bruker D8 ADVANCE ) with Cu K $\alpha$  (  $\lambda = 1.5418 \text{ \AA}$  ) recorded the diffraction ( XRD ) patterns of all samples. X-ray photoelectron spectroscopy ( XPS, Thermo ESCALAB 250XI ) was applied to research the valence states of all elements in samples. Laser Confocal Micro-Raman Spectroscopy ( LabRAM HR800, Horiba Jobin Yvon, France ) was utilized to present Raman spectra of all samples with 532 nm of laser wavelength. The annealing process of HAP, HAP+phen and phen were researched on Thermogravimetric analyzer ( TGA NETZSCH STA 449C). The material was pretreated in vacuum at 150 ° C for 4 hours and the nitrogen adsorption-desorption experiment was carried out on an automated specific surface (JWGB SCI. & TECH. , Beijing).

## Characterizations and Results

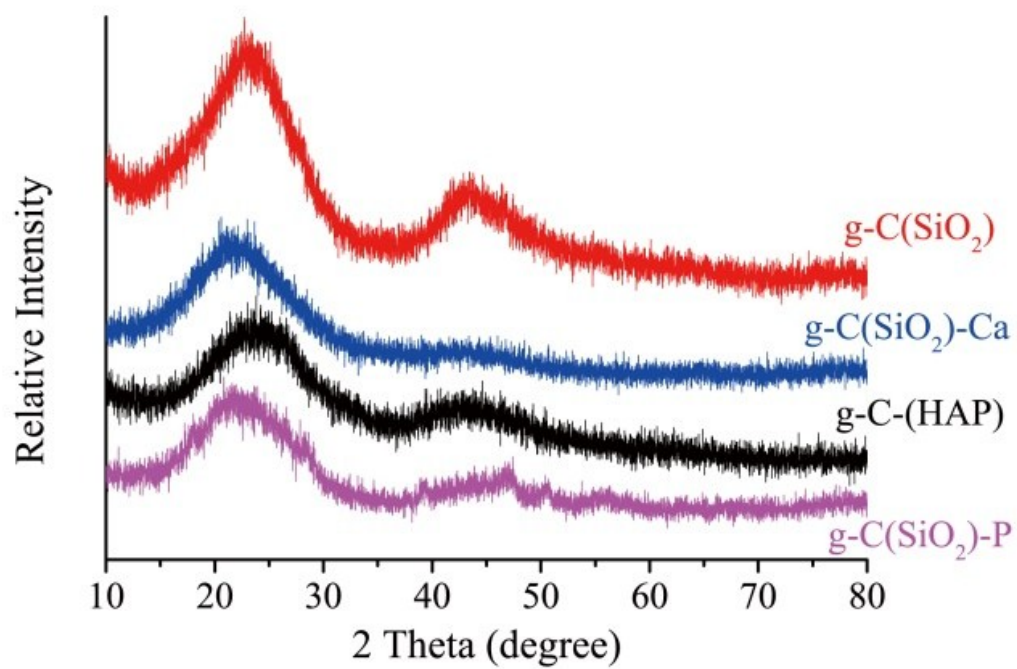

**Fig. S1** The XRD of different carbon materials.

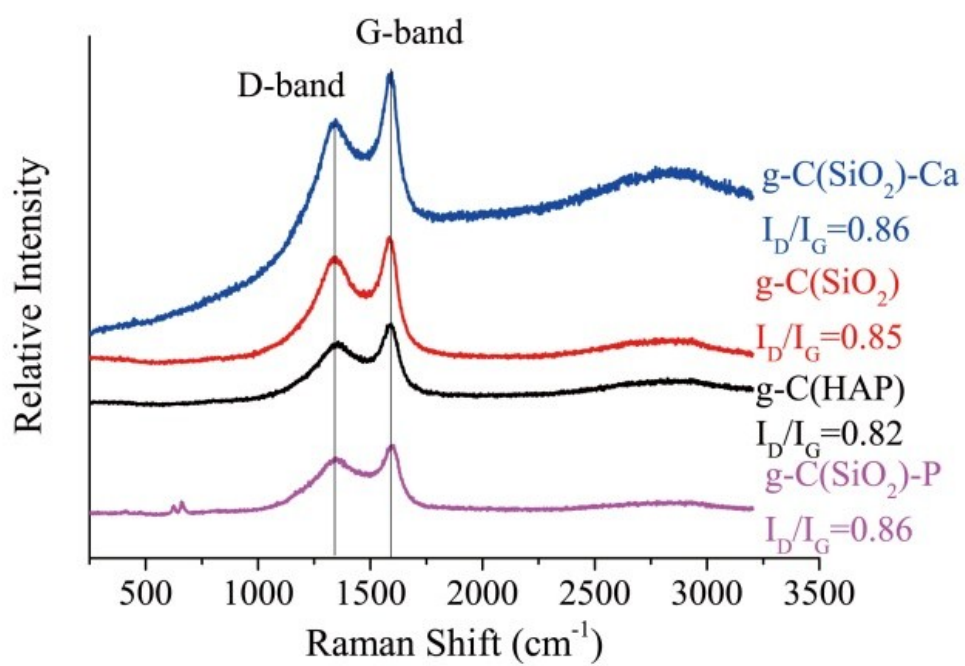

**Fig. S2** Raman spectra of g-C(HAP), g-C(SiO<sub>2</sub>), g-C(SiO<sub>2</sub>)-Ca and g-C(SiO<sub>2</sub>)-P.

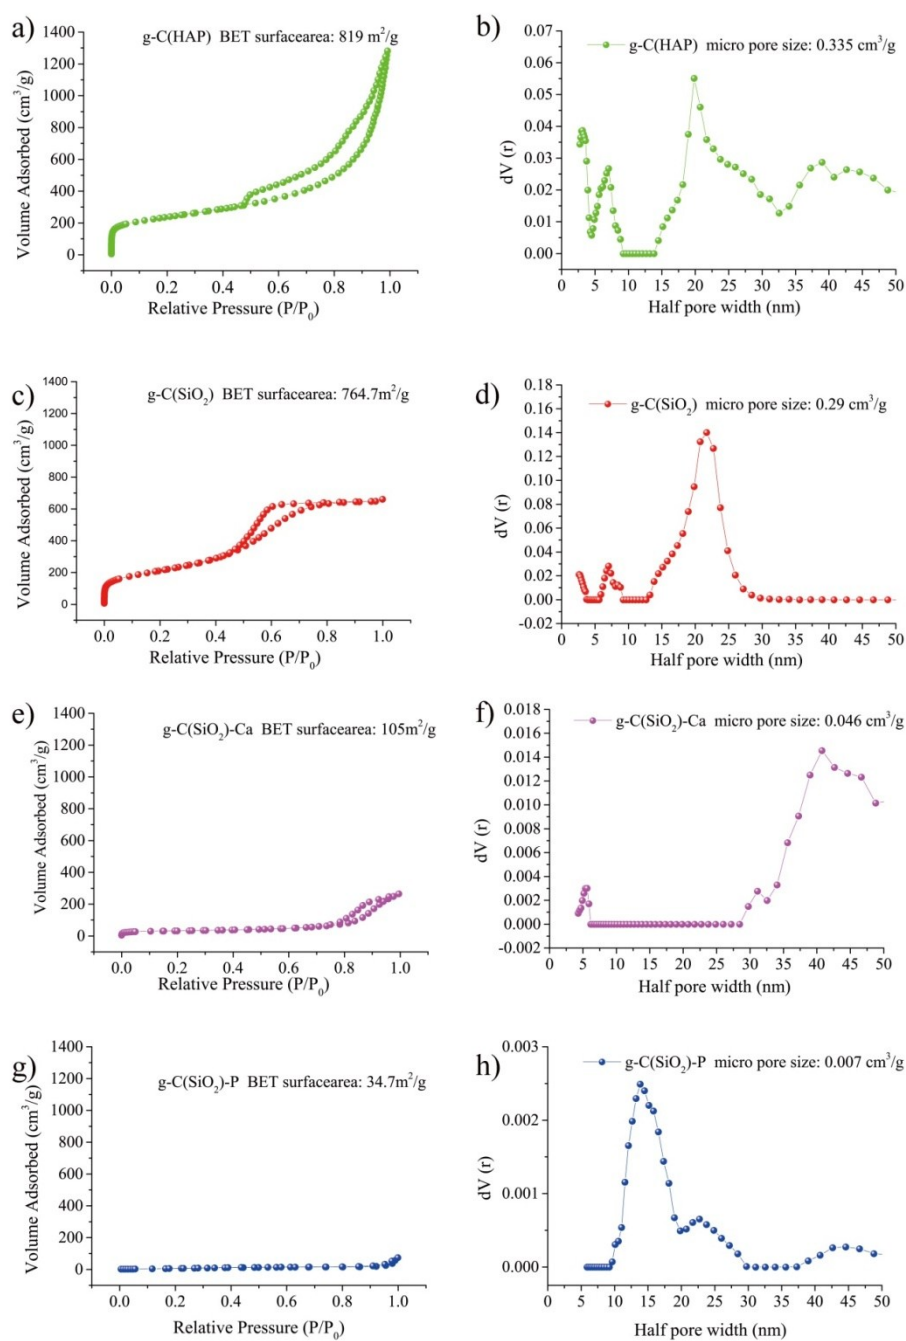

**Fig. S3** a), c), e) and g) N<sub>2</sub> adsorption-desorption isotherms of g-C(HAP), g-C(SiO<sub>2</sub>), g-C(SiO<sub>2</sub>)-P and g-C(SiO<sub>2</sub>)-Ca; b), d), f) and h) pore size distributions of g-C(HAP), g-C(SiO<sub>2</sub>), g-C(SiO<sub>2</sub>)-P and g-C(SiO<sub>2</sub>)-Ca based on NLDFT model of adsorption isotherms.

**Table S1.** The textural properties of all samples.

| <b>Sample</b>              | <b>S<sub>BET</sub><sup>a</sup><br/>(m<sup>2</sup>/g)</b> | <b>V<sub>total</sub><sup>b</sup><br/>(cm<sup>3</sup>/g)</b> | <b>V<sub>micro</sub><sup>c</sup><br/>(cm<sup>3</sup>/g)</b> | <b>P<sub>micropore</sub><sup>d</sup><br/>(nm)</b> | <b>P<sub>mesopore</sub><sup>e</sup><br/>(nm)</b> |
|----------------------------|----------------------------------------------------------|-------------------------------------------------------------|-------------------------------------------------------------|---------------------------------------------------|--------------------------------------------------|
| NC(HAP)-600                | 66                                                       | 0.037                                                       | 0.007                                                       | 1.16                                              | 2.185                                            |
| NC(HAP)                    | 115                                                      | 0.106                                                       | 0.04                                                        | 0.598                                             | 2.386                                            |
| NC(HAP)-800                | 162                                                      | 0.610                                                       | 0.071                                                       | 0.634                                             | -                                                |
| NC(SiO <sub>2</sub> )      | 518                                                      | 0.315                                                       | 0.226                                                       | 0.599                                             | 2.069                                            |
| g-C(SiO <sub>2</sub> )-P   | 34.7                                                     | 0.061                                                       | 0.007                                                       | 1.503                                             | 2.187                                            |
| g-C(SiO <sub>2</sub> )- Ca | 105                                                      | 0.371                                                       | 0.046                                                       | 0.64                                              | 16.85                                            |
| g-C(HAP)                   | 819                                                      | 1.698                                                       | 0.335                                                       | 0.620                                             | 2.078                                            |
| g-C(SiO <sub>2</sub> )     | 764.7                                                    | 0.947                                                       | 0.29                                                        | 0.645                                             | 4.799                                            |

<sup>a</sup> Specific BET surface area.

<sup>b</sup> Total pore volume, calculated according to nonlocal density functional theory (NLDFT) method.

<sup>c</sup> Micropore volume, calculated according to Horvaih-Kawazoe (HK) method.

<sup>d</sup> Micropore size, calculated according to Horvaih-Kawazoe (HK) method.

<sup>e</sup> Mesopore size, calculated by the Barret–Joyner–Halenda (BJH) method.



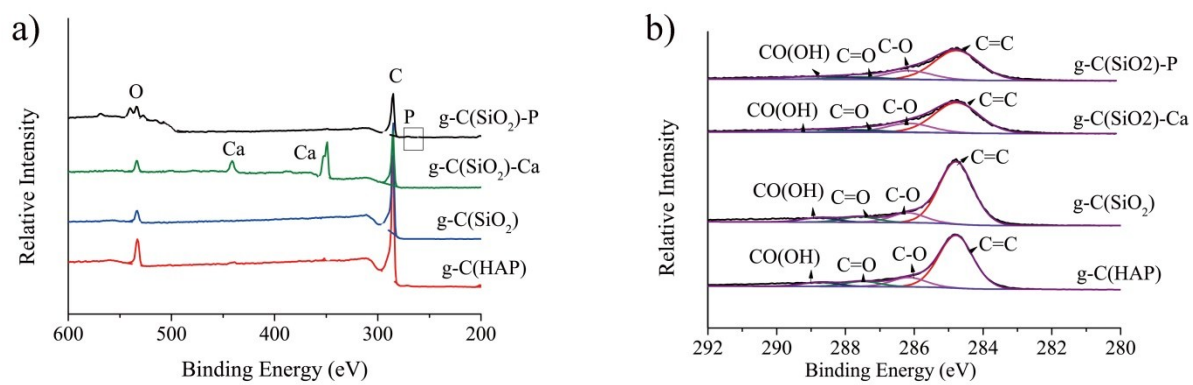

**Fig. S4** a) Full XPS spectrum of g-C(HAP), g-C(SiO<sub>2</sub>), g-C(SiO<sub>2</sub>)-P and g-C(SiO<sub>2</sub>)-Ca, b) XPS C1s spectrum of g-C(HAP), g-C(SiO<sub>2</sub>), g-C(SiO<sub>2</sub>)-P and g-C(SiO<sub>2</sub>)-Ca.

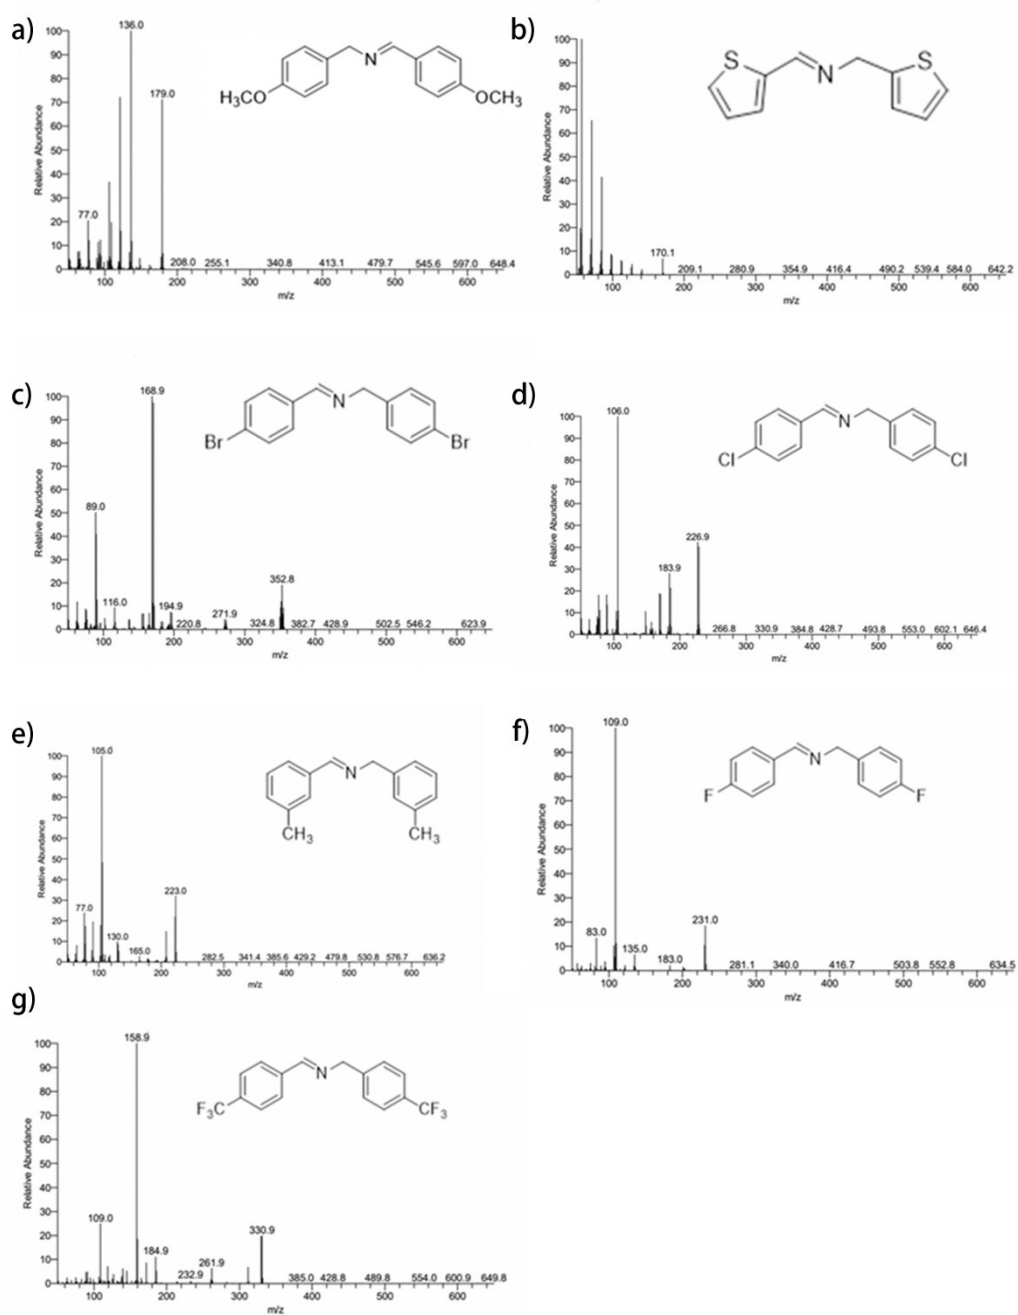

**Fig. S5** The structures of imines were all confirmed by GC-MS.

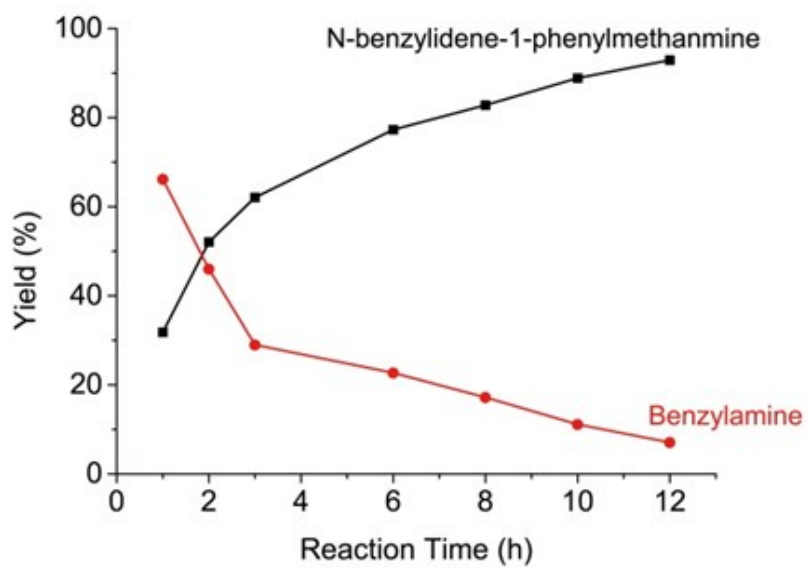

**Fig. S6** The conversion of benzylamine and the yield profile of the product imine at different reaction times. Reaction conditions: benzylamine ( 1 mmol ), solvent ( 3 mL ), NC(HAP) ( 0.01 g ), O<sub>2</sub> balloon, 50 °C.

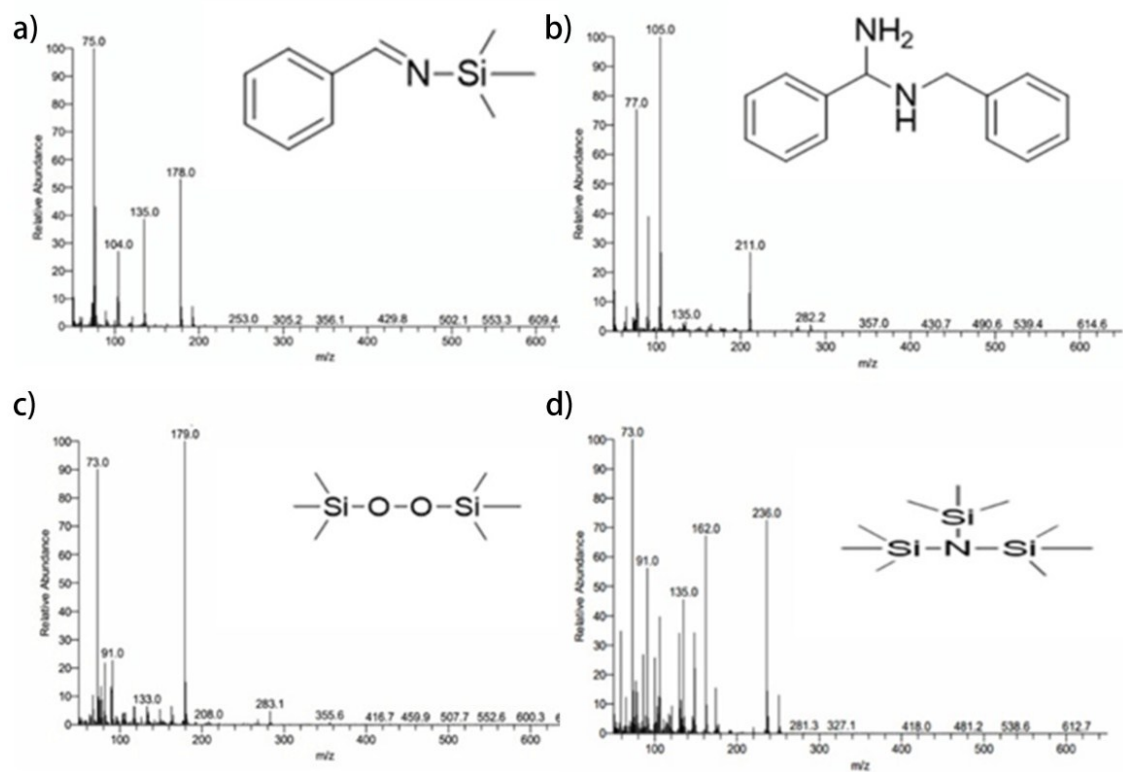

**Fig. S7** The experiment of silanization to capture intermediate which confirmed by GC-MS. a) phenylmethanimine, b) N-benzyl-1-phenylmethanediafine, c) hydroperoxide, d) ammonia.

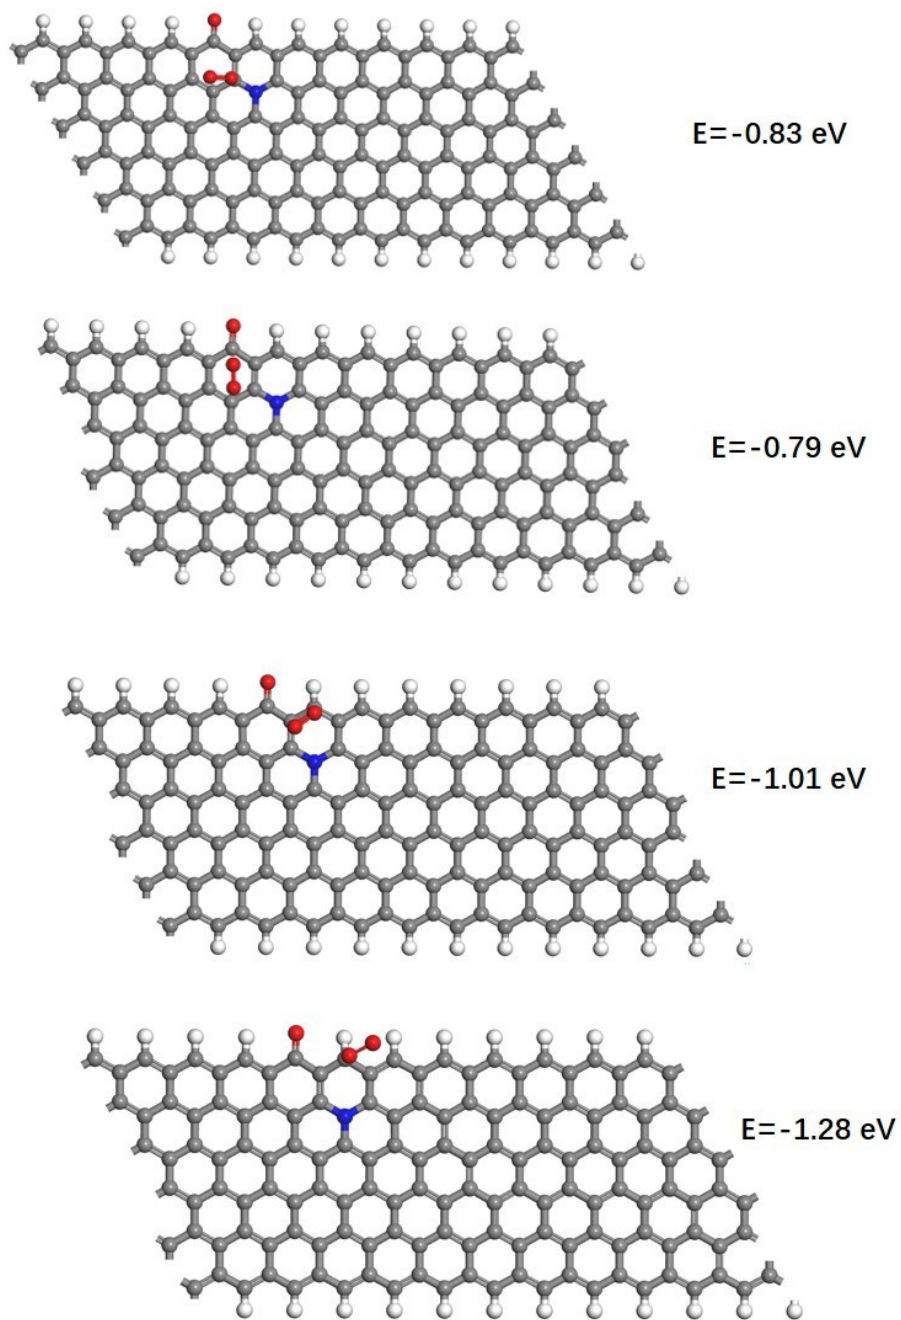

**Fig. S8** The configurations and energy of the oxygen adsorbed on model catalyst.

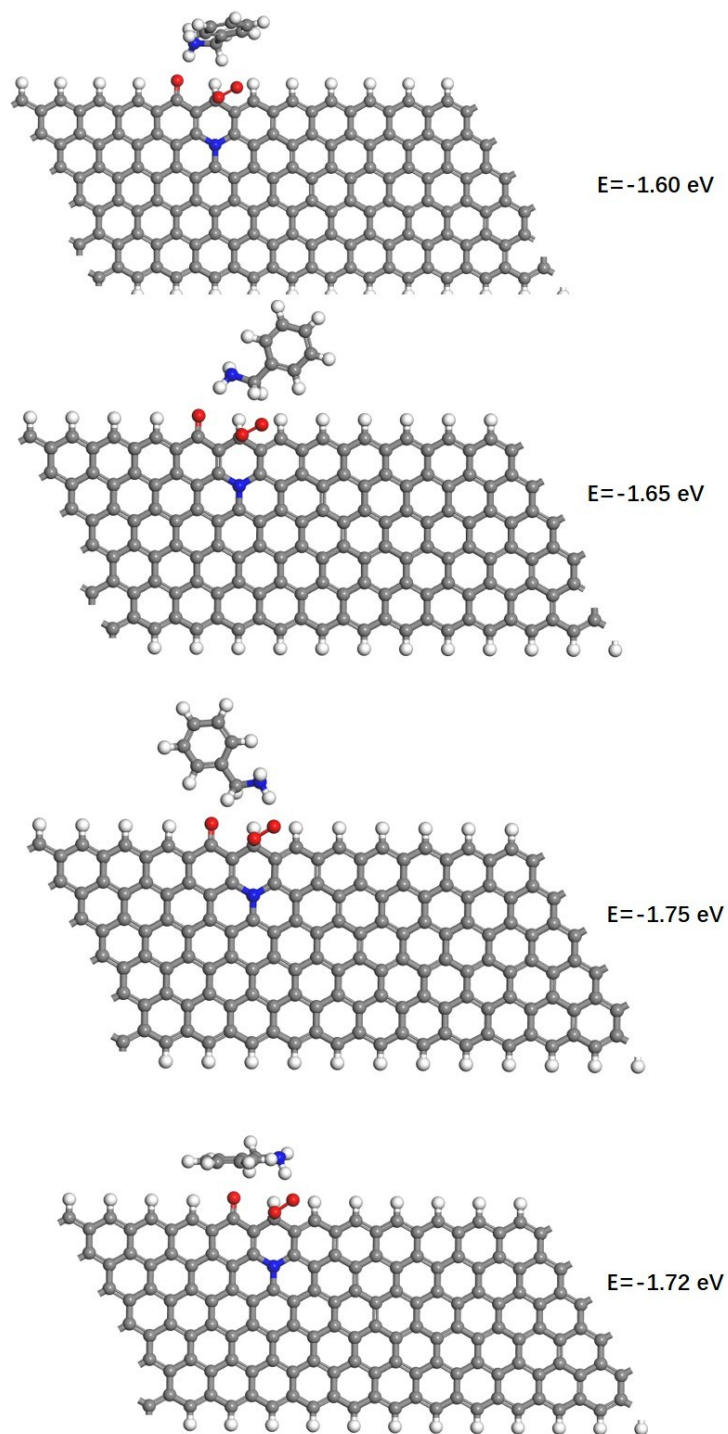

**Fig. S9** The configurations and energy of benzylamine adsorbed on model catalyst anchoring oxygen molecule.

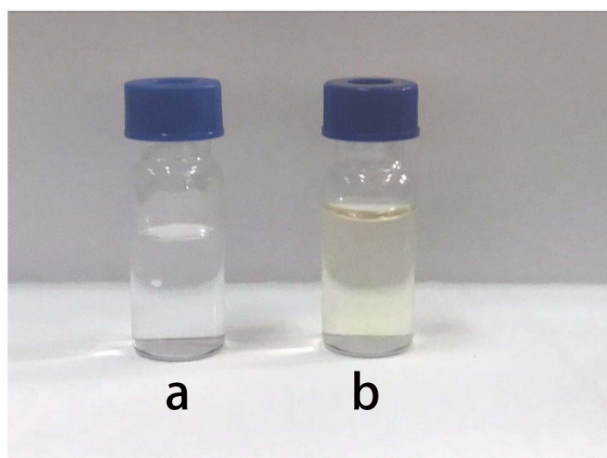

**Fig. S10** a) The filtrate was obtained without NC(HAP) catalyst; b) The filtrate was obtained by hydroperoxide oxidized TMB.
